# Supplementary material
Source: PubMed Central journal article supplement (PMC2781684)
Supplement: supp_M109.059360_jbc.M109.059360-4.pdf [file supp_M109.059360_jbc.M109.059360-4.pdf]

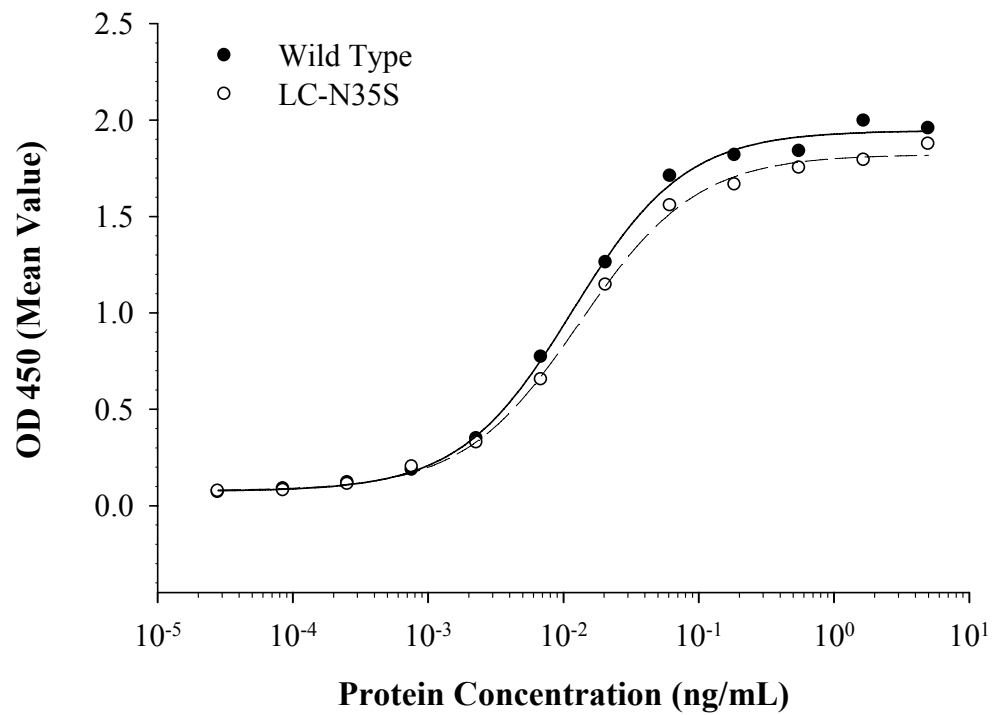

**Supplemental Fig. 3.** Binding of Antibody A to its antigen protein. Closed circles: the wild type (mAb A-1). Open circles: the protein with an Asn→Ser mutation at position 35 in the light chain.
